# Supplementary material
Source: PubMed Central journal article supplement (PMC1180533)

## Online Figure Legends

Online Figure 1. **Coordinated expression of ZAP-70 and eGFP in T cells transduced with the pT-ZAP lentiviral vector.** ZAP-70-deficient Jurkat T cells (clone p116) were transduced with the pT-ZAP vector. (A) Following transduction, cells were sorted on the basis of EGFP expression, resulting in the maintenance of populations with distinct EGFP levels. These populations are designated as GFP<sup>lo</sup>, GFP<sup>med</sup>, and GFP<sup>hi</sup>, and their relative fluorescence is shown. The basal fluorescence of untransduced cells is shown in the filled histogram. (B) ZAP-70 and eGFP levels were monitored by western blotting of whole cell lysates from the three populations with monoclonal  $\alpha$ -ZAP-70 and polyclonal  $\alpha$ -EGFP antibodies, respectively. Protein loading was verified by immunoblotting with an  $\alpha$ -Erk-2 mAb.

Online Figure 2. **Thymocyte and splenocyte profiles in ZAP-70<sup>-/-</sup> mice following in situ injection of an EGFP-expressing lentiviral vector.** ZAP-70<sup>-/-</sup> mice (14-17 days of age) were intrathymically injected with an eGFP-expressing lentiviral vector ( $2 \times 10^7$  TU in a total volume of 20  $\mu$ ls). Thymi and spleens were harvested from euthanized animals 14 weeks later. The percentages of double negative, double positive and CD4+ and CD8+ single positive thymocytes in 1 of 3 mice are shown. The percentages of CD3+ T cells and CD19+ B cells in spleens isolated from 1 of 3 mice are shown.

Online Figure 3. **Thymocyte profiles in ZAP-70<sup>-/-</sup> mice 72 hours post in situ injection of EGFP- and ZAP-70-EGFP expressing lentiviral vectors.** Virions harboring a ZAP-70-expressing lentiviral vector (pT-ZAP) or a control EGFP-expressing lentiviral vector were injected intrathymically into ZAP-70<sup>-/-</sup> mice and thymocytes were harvested from euthanized animals 3 days later. The percentages of double negative, double positive and CD4+ and CD8+ single positive thymocytes in WT (C57/B16) and ZAP-70<sup>-/-</sup> mice are indicated in the top left dot plots. Representative thymi from 1 of 3 animals injected with each type of virions ( $1 \times 10^7$  transducing units, in a total volume of 20  $\mu$ ls) are shown 3 days following injection. The percentages of cells in each thymocyte population are noted. The percentages of eGFP+ cells within each of these subsets were assessed and are presented as SSC/EGFP dot plots.

Online Figure 4. **Thymocyte profile of a ZAP-70<sup>-/-</sup> mouse 1 year following in situ injection of a ZAP-70-EGFP expressing lentiviral vector.** A ZAP-70<sup>-/-</sup> mouse, IT-injected with pT-ZAP lentiviral virions, was maintained in pathogen-free conditions, for one year post-treatment. The animal was then euthanized and the distribution of thymocyte populations and eGFP<sup>+</sup> cells was analyzed. The percentages of eGFP<sup>+</sup> cells within each thymocyte population are indicated and conversely, the relative distribution of thymocyte populations within the eGFP<sup>-</sup> and eGFP<sup>+</sup> subsets are shown.

Online figure 1

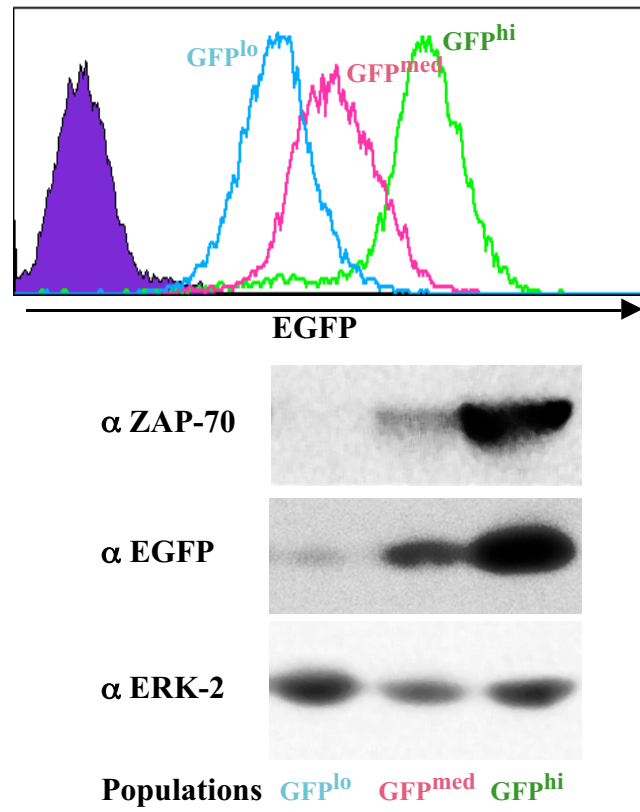

Online figure 2

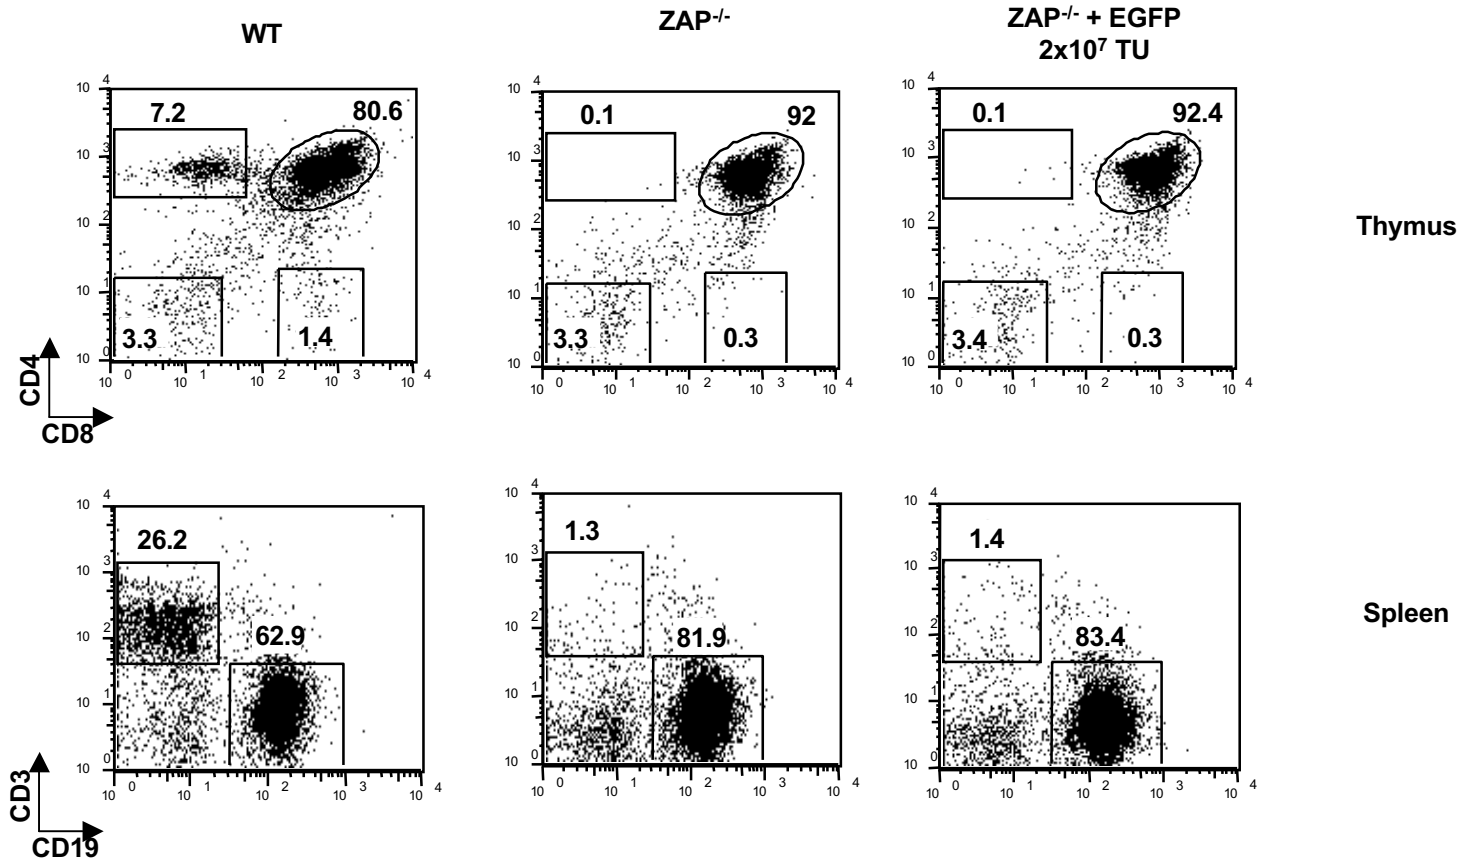

Online figure 3

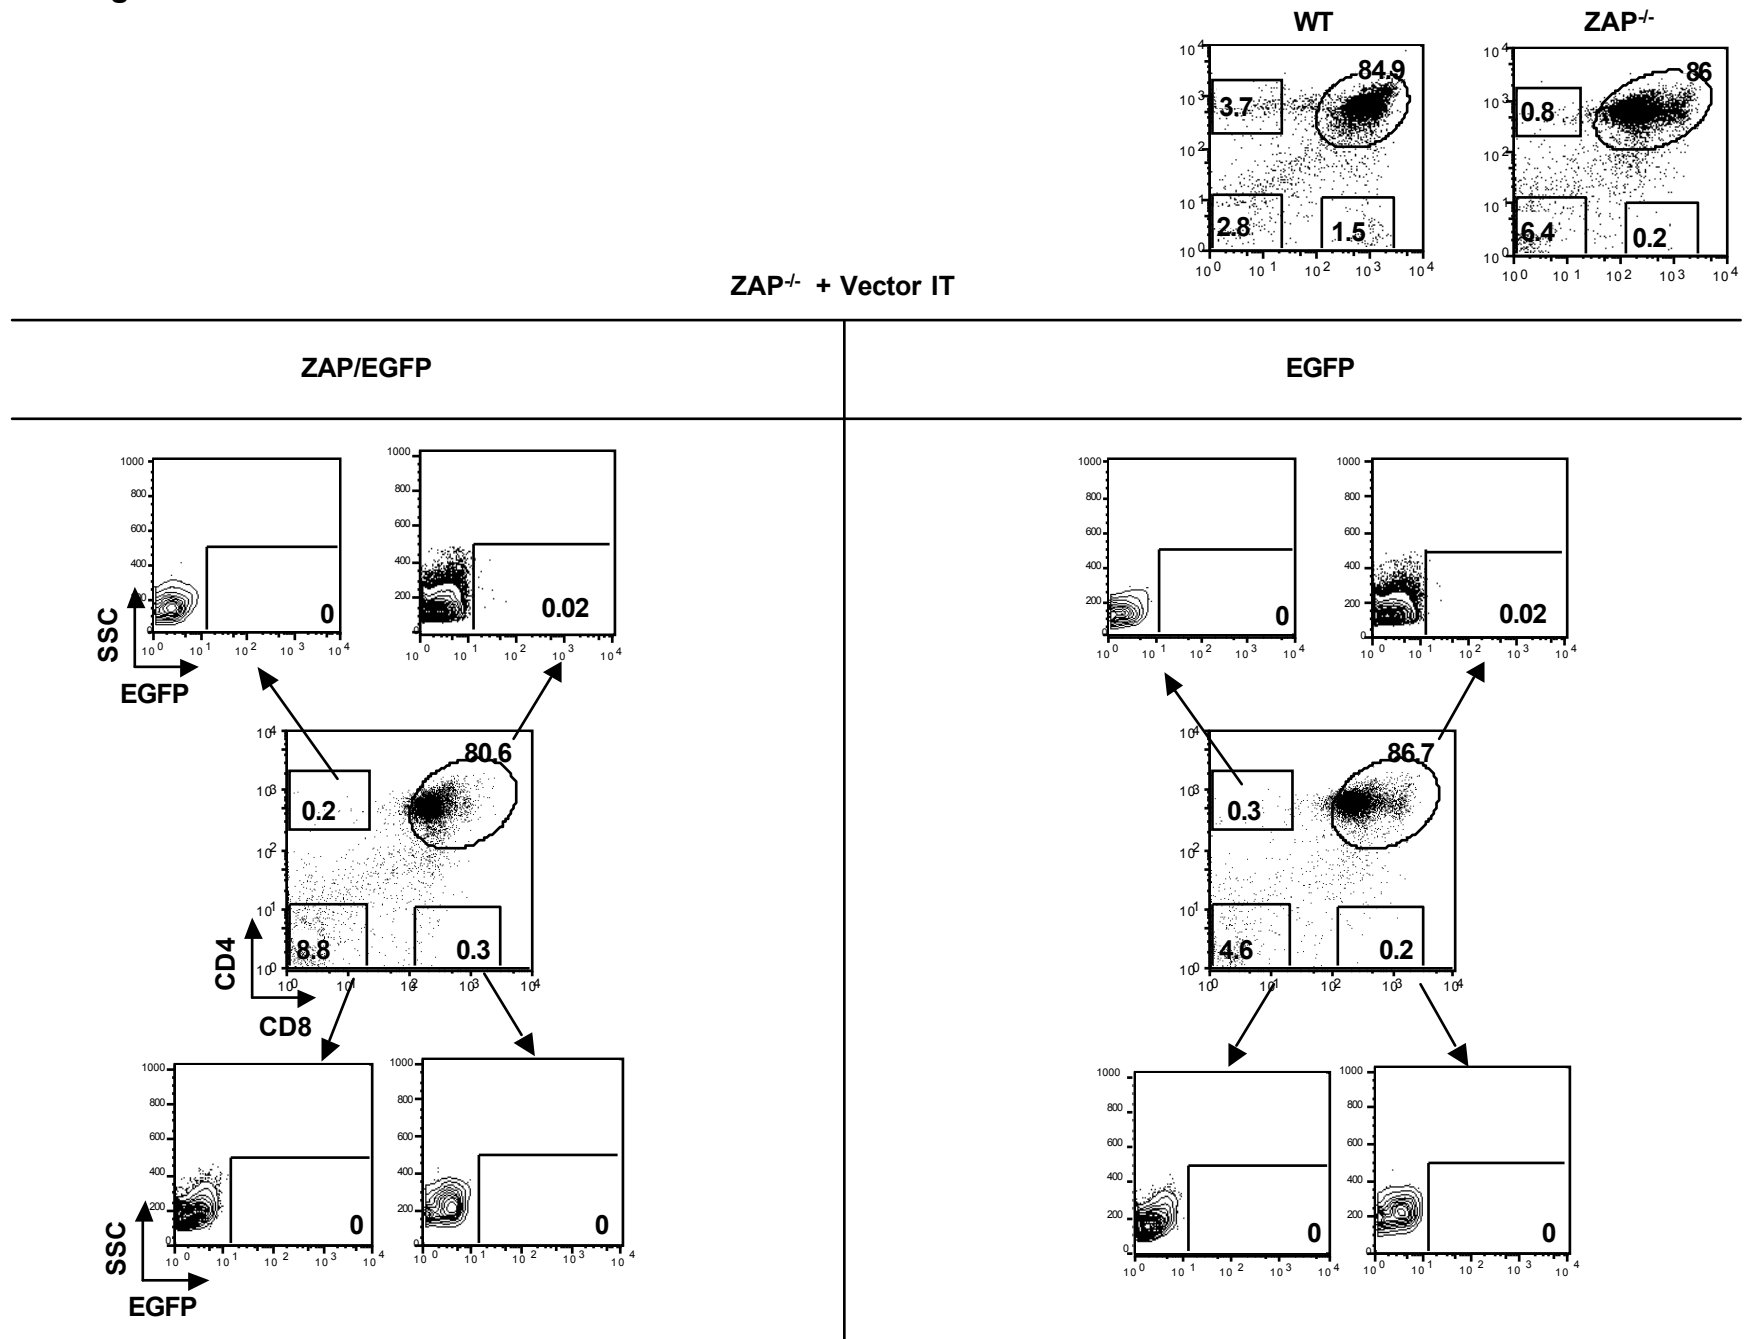

Online figure 4

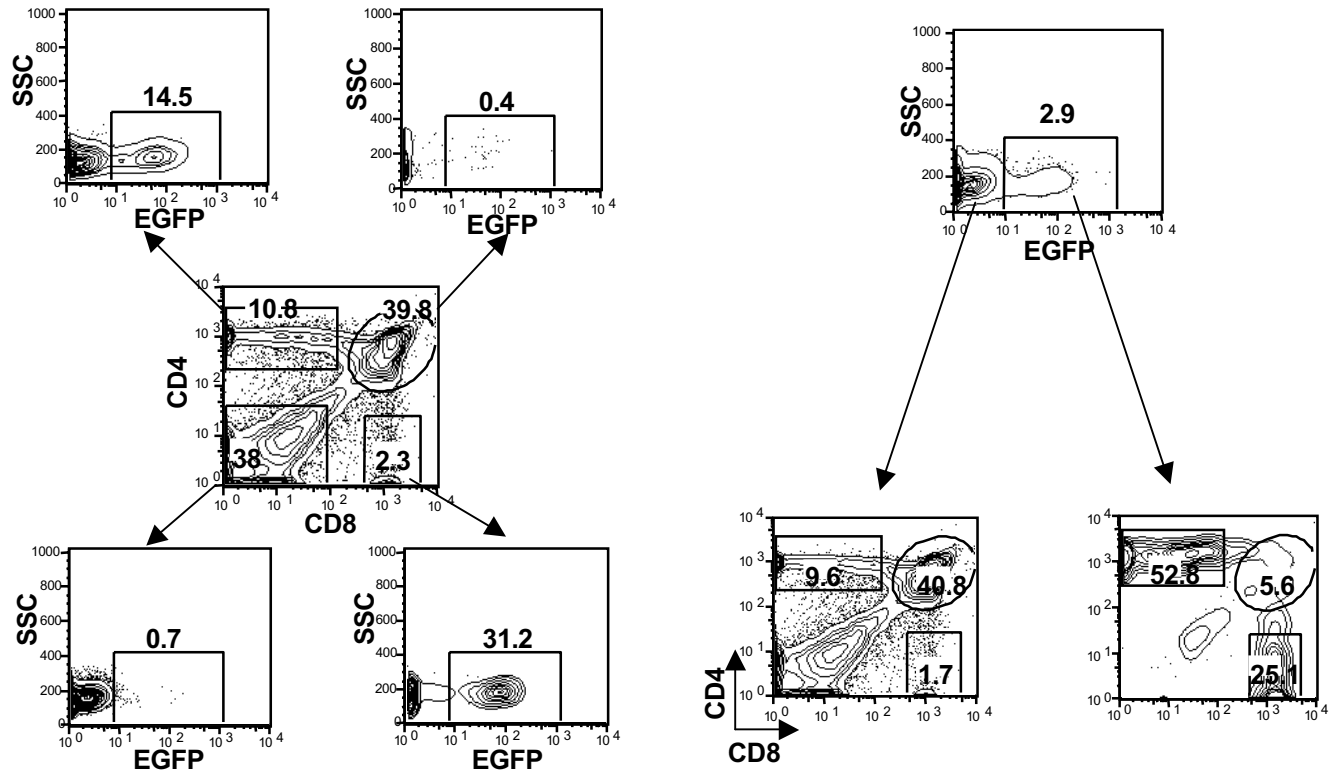

Supplement: JCI0523966sd.pdf [file JCI0523966sd.pdf]
